# Supplementary material for: A Warming Welcome? Belgium’s Increasing Suitability for Aedes albopictus
Source: Research Square preprint supplement (doi:10.21203/rs.3.rs-7057895/v1), 2025-09-17
Supplement: Supplementary file 1 [file 639e63fd77ea2b43ff61a540.docx]

# **A Warming Welcome? Belgium’s Increasing Suitability for *Aedes albopictus***

Daniele Da Re1,2, Isra Deblauwe3, Emmanuelle Inès Kern4, Marie Hermy5, Javiera Rebolledo5, Katrien Tersago6, Veerle Versteirt7, Birgit Dumez8, Cyrelle Houtsaeger9, Lieze Rouffaer9, Olivier Beck10, Wim Van Bortel3,11*

## Supplementary Materials

**Table S1**. Overview of the introduction scenarios

| **Introduction** | **Date of the introduction** | **Number of eggs** | **Years** |
| --- | --- | --- | --- |
| Single | June 30 | 500, 1000 | 2018-2021 |
| Single | July 15 | 500, 1000 | 2018-2021 |
| Multiple | First introduction event on June 30, then three random events of introduction until 15th September | 500, 1000 | 2018-2021 |
| Multiple | First introduction event on July 15, then three random events of introduction until 15th September | 500, 1000 | 2018-2021 |

**Table S2**. Results of ANOVA assessing the effects of season, year, region, and their interactions on air temperature across the three regions of Belgium (Brussels, Flanders, and Wallonia) and years (2018-2021). All factors and interactions showed statistically significant contributions (p < 0.001), indicating pronounced spatiotemporal variability in air temperature.

| **Source** | **Df** | **Sum Sq** | **Mean Sq** | **F value** | **Pr(>F)** |
| --- | --- | --- | --- | --- | --- |
| season | 3 | 439343549 | 146447850 | 7659275 | <2e-16 |
| year | 4 | 5763510 | 1440877 | 75358 | <2e-16 |
| Region | 2 | 5566167 | 2783084 | 145556 | <2e-16 |
| season×year | 12 | 4939396 | 411616 | 21528 | <2e-16 |

**Table S3**. Post-hoc Tukey pairwise comparisons of air temperature across seasons, years, and regions. The analysis highlights significant temperature differences within each season and between regions and years, further confirming the spatial and temporal heterogeneity observed in the ANOVA results. DJF: December-January-February; MAM: March-April-May; JJA: June-July-August; SON: September-October-November.

| **Comparison** | **Estimate** | **Lower CI** | **Upper CI** | **p-value** |
| --- | --- | --- | --- | --- |
| DJF:2019-DJF:2018 | 0.5351 | 0.5089 | 0.5613 | <0.0001 |
| DJF:2020-DJF:2018 | 2.1619 | 2.1357 | 2.188 | <0.0001 |
| DJF:2021-DJF:2018 | 0.0099 | -0.0163 | 0.0361 | <0.0001 |
| DJF:2022-DJF:2018 | 0.6373 | 0.6111 | 0.6635 | <0.0001 |
| JJA:2019-JJA:2018 | -0.3912 | -0.4171 | -0.3653 | <0.0001 |
| JJA:2020-JJA:2018 | -0.9506 | -0.9765 | -0.9247 | <0.0001 |
| JJA:2021-JJA:2018 | -2.0691 | -2.095 | -2.0432 | <0.0001 |
| JJA:2022-JJA:2018 | 0.0898 | 0.0639 | 0.1157 | <0.0001 |
| MAM:2019-MAM:2018 | -1.1424 | -1.1683 | -1.1165 | <0.0001 |
| MAM:2020-MAM:2018 | -0.54 | -0.5659 | -0.514 | <0.0001 |
| MAM:2021-MAM:2018 | -3.1447 | -3.1706 | -3.1188 | <0.0001 |
| MAM:2022-MAM:2018 | -0.3323 | -0.3582 | -0.3064 | <0.0001 |
| SON:2019-SON:2018 | -0.2984 | -0.3244 | -0.2723 | <0.0001 |
| SON:2020-SON:2018 | 0.6357 | 0.6097 | 0.6618 | <0.0001 |
| SON:2021-SON:2018 | 0.0713 | 0.0453 | 0.0974 | <0.0001 |
| SON:2022-SON:2018 | 1.6956 | 1.6695 | 1.7216 | <0.0001 |
| DJF:2020-DJF:2019 | 1.6268 | 1.6006 | 1.6529 | <0.0001 |
| DJF:2021-DJF:2019 | -0.5252 | -0.5514 | -0.499 | <0.0001 |
| DJF:2022-DJF:2019 | 0.1022 | 0.076 | 0.1284 | <0.0001 |
| JJA:2020-JJA:2019 | -0.5594 | -0.5853 | -0.5335 | <0.0001 |
| JJA:2021-JJA:2019 | -1.678 | -1.7039 | -1.6521 | <0.0001 |
| **Comparison** | **Estimate** | **Lower CI** | **Upper CI** | **p-value** |
| JJA:2022-JJA:2019 | 0.481 | 0.4551 | 0.5069 | <0.0001 |
| MAM:2020-MAM:2019 | 0.6025 | 0.5766 | 0.6284 | <0.0001 |
| MAM:2021-MAM:2019 | -2.0023 | -2.0282 | -1.9764 | <0.0001 |
| MAM:2022-MAM:2019 | 0.8101 | 0.7842 | 0.836 | <0.0001 |
| SON:2020-SON:2019 | 0.9341 | 0.9081 | 0.9602 | <0.0001 |
| SON:2021-SON:2019 | 0.3697 | 0.3437 | 0.3958 | <0.0001 |
| SON:2022-SON:2019 | 1.994 | 1.9679 | 2.02 | <0.0001 |
| DJF:2021-DJF:2020 | -2.152 | -2.1781 | -2.1259 | <0.0001 |
| DJF:2022-DJF:2020 | -1.5246 | -1.5507 | -1.4984 | <0.0001 |
| JJA:2021-JJA:2020 | -1.1186 | -1.1445 | -1.0926 | <0.0001 |
| JJA:2022-JJA:2020 | 1.0404 | 1.0145 | 1.0663 | <0.0001 |
| MAM:2021-MAM:2020 | -2.6048 | -2.6307 | -2.5789 | <0.0001 |
| MAM:2022-MAM:2020 | 0.2076 | 0.1817 | 0.2335 | <0.0001 |
| SON:2021-SON:2020 | -0.5644 | -0.5905 | -0.5384 | <0.0001 |
| SON:2022-SON:2020 | 1.0598 | 1.0338 | 1.0859 | <0.0001 |
| DJF:2022-DJF:2021 | 0.6274 | 0.6012 | 0.6536 | <0.0001 |
| JJA:2022-JJA:2021 | 2.1589 | 2.133 | 2.1848 | <0.0001 |
| MAM:2022-MAM:2021 | 2.8124 | 2.7865 | 2.8383 | <0.0001 |
| SON:2022-SON:2021 | 1.6243 | 1.5982 | 1.6503 | <0.0001 |
